# Supplementary material
Source: HighWire-hosted journal article supplement (https://www.cmajopen.ca/highwire/filestream/80846/field_highwire_adjunct_files/5/open-2014-0044-4-at.pdf)
Supplement: open-2014-0044-4-at.pdf [file open-2014-0044-4-at.pdf]

**Appendix 4 (as supplied by the authors): Quality assessment according to Newcastle–Ottawa Scale\***

| Assessment of quality of a cohort study<br>Newcastle–Ottawa Scale                                                       | Retrospective Cohort Studies        |                                     |                                     |                                     |                                     | Cohort Before-and-after studies     |                                     |                                     |                                     |
|-------------------------------------------------------------------------------------------------------------------------|-------------------------------------|-------------------------------------|-------------------------------------|-------------------------------------|-------------------------------------|-------------------------------------|-------------------------------------|-------------------------------------|-------------------------------------|
|                                                                                                                         | Fraser et al <sup>1</sup>           | Keele et al <sup>2</sup>            | Dussel et al <sup>3</sup>           | Knapp et al <sup>4</sup>            | Ward-Smith et al <sup>9+</sup>      | Arland et al <sup>5</sup>           | Postier et al <sup>6</sup>          | Gans et al <sup>7</sup>             | Pascuet et al <sup>8</sup>          |
| <b>Selection</b> (tick one box in each section)                                                                         |                                     |                                     |                                     |                                     |                                     |                                     |                                     |                                     |                                     |
| 1. Representativeness of the intervention cohort                                                                        |                                     |                                     |                                     |                                     |                                     |                                     |                                     |                                     |                                     |
| a) truly representative of the average (child) recipient of palliative care ★                                           | <input type="checkbox"/>            | <input type="checkbox"/>            | <input type="checkbox"/>            | <input type="checkbox"/>            | <input type="checkbox"/>            | <input type="checkbox"/>            | ★                                   | <input type="checkbox"/>            | ★                                   |
| b) somewhat representative of the average (child) recipient of palliative care (only 1 disease category; e.g. cancer) ★ | ★                                   | ★                                   | ★                                   | ★                                   | <input type="checkbox"/>            | ★                                   | <input type="checkbox"/>            | <input type="checkbox"/>            | <input type="checkbox"/>            |
| c) selected group of patients, e.g. certain insurance coverage, age specific                                            | <input type="checkbox"/>            | <input type="checkbox"/>            | <input type="checkbox"/>            | <input type="checkbox"/>            | <input checked="" type="checkbox"/> | <input type="checkbox"/>            | <input type="checkbox"/>            | <input checked="" type="checkbox"/> | <input type="checkbox"/>            |
| d) no description of the derivation of the cohort                                                                       | <input type="checkbox"/>            | <input type="checkbox"/>            | <input type="checkbox"/>            | <input type="checkbox"/>            | <input type="checkbox"/>            | <input type="checkbox"/>            | <input type="checkbox"/>            | <input type="checkbox"/>            | <input type="checkbox"/>            |
| 2. Selection of the non intervention cohort                                                                             |                                     |                                     |                                     |                                     |                                     |                                     |                                     |                                     |                                     |
| a) drawn from the same community as the intervention cohort ★                                                           | ★                                   | ★                                   | ★                                   | ★                                   | <input type="checkbox"/>            | ★                                   | <input type="checkbox"/>            | <input type="checkbox"/>            | <input type="checkbox"/>            |
| b) drawn from a different source                                                                                        | <input type="checkbox"/>            | <input type="checkbox"/>            | <input type="checkbox"/>            | <input type="checkbox"/>            | <input type="checkbox"/>            | <input type="checkbox"/>            | <input type="checkbox"/>            | <input type="checkbox"/>            | <input type="checkbox"/>            |
| c) no description of the derivation of the non intervention cohort, or no controls                                      | <input type="checkbox"/>            | <input type="checkbox"/>            | <input type="checkbox"/>            | <input type="checkbox"/>            | <input checked="" type="checkbox"/> | <input type="checkbox"/>            | <input checked="" type="checkbox"/> | <input checked="" type="checkbox"/> | <input checked="" type="checkbox"/> |
| 3. Ascertainment of intervention                                                                                        |                                     |                                     |                                     |                                     |                                     |                                     |                                     |                                     |                                     |
| a) secure record (eg healthcare record, claims/billing system) ★                                                        | ★                                   | ★                                   | <input type="checkbox"/>            | ★                                   | ★                                   | ★                                   | ★                                   | ★                                   | ★                                   |
| b) structured interview ★                                                                                               | <input type="checkbox"/>            | <input type="checkbox"/>            | ★                                   | <input type="checkbox"/>            | <input type="checkbox"/>            | <input type="checkbox"/>            | <input type="checkbox"/>            | <input type="checkbox"/>            | <input type="checkbox"/>            |
| c) written self report                                                                                                  | <input type="checkbox"/>            | <input type="checkbox"/>            | <input type="checkbox"/>            | <input type="checkbox"/>            | <input type="checkbox"/>            | <input type="checkbox"/>            | <input type="checkbox"/>            | <input type="checkbox"/>            | <input type="checkbox"/>            |
| d) other / no description                                                                                               | <input type="checkbox"/>            | <input type="checkbox"/>            | <input type="checkbox"/>            | <input type="checkbox"/>            | <input type="checkbox"/>            | <input type="checkbox"/>            | <input type="checkbox"/>            | <input type="checkbox"/>            | <input type="checkbox"/>            |
| 4. Demonstration that outcome of interest was not present at start of study                                             |                                     |                                     |                                     |                                     |                                     |                                     |                                     |                                     |                                     |
| a) yes ★                                                                                                                | <input type="checkbox"/>            | <input type="checkbox"/>            | <input type="checkbox"/>            | <input type="checkbox"/>            | <input type="checkbox"/>            | <input type="checkbox"/>            | <input type="checkbox"/>            | <input type="checkbox"/>            | <input type="checkbox"/>            |
| b) no                                                                                                                   | <input checked="" type="checkbox"/> | <input checked="" type="checkbox"/> | <input checked="" type="checkbox"/> | <input checked="" type="checkbox"/> | <input checked="" type="checkbox"/> | <input checked="" type="checkbox"/> | <input checked="" type="checkbox"/> | <input checked="" type="checkbox"/> | <input checked="" type="checkbox"/> |

*continued*

| Assessment of quality of a cohort study<br>Newcastle Ottawa Scale                                                                                                                                                                                                                                | Retrospective Cohort Studies |                          |                           |                          |                                | Cohort Before-and-after studies |                            |                         |                            |
|--------------------------------------------------------------------------------------------------------------------------------------------------------------------------------------------------------------------------------------------------------------------------------------------------|------------------------------|--------------------------|---------------------------|--------------------------|--------------------------------|---------------------------------|----------------------------|-------------------------|----------------------------|
| Comparability (tick one or both boxes, as appropriate)                                                                                                                                                                                                                                           | Fraser et al <sup>1</sup>    | Keele et al <sup>2</sup> | Dussel et al <sup>3</sup> | Knapp et al <sup>4</sup> | Ward-Smith et al <sup>9†</sup> | Arland et al <sup>5</sup>       | Postier et al <sup>6</sup> | Gans et al <sup>7</sup> | Pascuet et al <sup>8</sup> |
| 1. Comparability of cohorts on the basis of the design or analysis                                                                                                                                                                                                                               |                              |                          |                           |                          |                                |                                 |                            |                         |                            |
| a) study controls for age, sex, exposure to the program (survival), disease ★                                                                                                                                                                                                                    | ★                            | ☐                        | ☐                         | ☐                        | ☐                              | ☐                               | ★                          | ★                       | ☐                          |
| b) study controls for any additional factors (e.g., socioeconomic status, education, geography) ★                                                                                                                                                                                                | ☐                            | ★                        | ☐                         | ★                        | ☐                              | ☐                               | ☐                          | ☐                       | ☐                          |
| <b>Outcome</b> (tick one box in each section)                                                                                                                                                                                                                                                    |                              |                          |                           |                          |                                |                                 |                            |                         |                            |
| 1. Assessment of outcome                                                                                                                                                                                                                                                                         |                              |                          |                           |                          |                                |                                 |                            |                         |                            |
| a) independent blind assessment ★                                                                                                                                                                                                                                                                | ☐                            | ☐                        | ☐                         | ☐                        | ☐                              | ☐                               | ☐                          | ☐                       | ☐                          |
| b) record linkage ★                                                                                                                                                                                                                                                                              | ★                            | ★                        | ★                         | ★                        | ★                              | ★                               | ★                          | ★                       | ★                          |
| c) self report                                                                                                                                                                                                                                                                                   | ☐                            | ☐                        | ☑                         | ☐                        | ☐                              | ☐                               | ☐                          | ☐                       | ☐                          |
| d) other / no description                                                                                                                                                                                                                                                                        | ☐                            | ☐                        | ☐                         | ☐                        | ☐                              | ☐                               | ☐                          | ☐                       | ☐                          |
| 2. Was follow up long enough for outcomes to occur?                                                                                                                                                                                                                                              |                              |                          |                           |                          |                                |                                 |                            |                         |                            |
| a) yes, if median duration >= 2 months ★                                                                                                                                                                                                                                                         | ★                            | ☐                        | ☐                         | ★                        | ★                              | ★                               | ★                          | ☐                       | ☐                          |
| b) no, if median duration < 2 months, or unclear                                                                                                                                                                                                                                                 | ☐                            | ☑                        | ☑                         | ☐                        | ☐                              | ☐                               | ☐                          | ☑                       | ☑                          |
| 3. Adequacy of follow up of cohorts                                                                                                                                                                                                                                                              |                              |                          |                           |                          |                                |                                 |                            |                         |                            |
| a) complete follow up: all subjects accounted for length of exposure to PPCP (survival bias) ★                                                                                                                                                                                                   | ☐                            | ☐                        | ☐                         | ☐                        | ☐                              | ☐                               | ★                          | ☐                       | ☐                          |
| b) subjects lost to follow up unlikely to introduce bias: number lost <= 20%, all ages included, all diseases, or description of those lost suggesting no difference from those followed ★                                                                                                       | ☐                            | ☐                        | ☐                         | ☐                        | ☐                              | ☐                               | ☐                          | ☐                       | ☐                          |
| c) follow up rate < 80% (select an adequate %) and no description of those lost, or description suggesting differences from those followed                                                                                                                                                       | ☑                            | ☑                        | ☑                         | ☑                        | ☑                              | ☑                               | ☐                          | ☑                       | ☑                          |
| d) no statement                                                                                                                                                                                                                                                                                  | ☐                            | ☐                        | ☐                         | ☐                        | ☐                              | ☐                               | ☐                          | ☐                       | ☐                          |
| <p>Note: PPCP = pediatric palliative care program.<br/> *The case series of 3 patients<sup>10</sup> and the conference abstract<sup>11</sup> were not included in the quality assessment.<br/> †Described by the authors as a case-control study but technically it was a cohort comparison.</p> |                              |                          |                           |                          |                                |                                 |                            |                         |                            |

If the article meets a criterion followed by a ★, the box will appear as a ★. If the article meets a criterion that is not followed by a ★, then the box will appear ticked ☑. If the article does not meet any criteria in the checklist the boxes will not appear ticked ☐. References and manual on how to use the scale from the Ottawa Hospital Research Institute available at [http://www.ohri.ca/programs/clinical\\_epidemiology/oxford.asp](http://www.ohri.ca/programs/clinical_epidemiology/oxford.asp)

## References

1. Fraser LK, van Laar M, Miller M, et al. Does referral to specialist paediatric palliative care services reduce hospital admissions in oncology patients at the end of life? *Br J Cancer* 2013;108:1273-9.
2. Keele L, Keenan HT, Sheetz J, et al. Differences in characteristics of dying children who receive and do not receive palliative care. *Pediatrics* 2013;132:72-8.
3. Dussel V, Kreicbergs U, Hilden JM, et al. Looking beyond where children die: determinants and effects of planning a child's location of death. *J Pain Symptom Manage* 2009;37:33-43.
4. Knapp CA, Shenkman E, Marcu M, et al. Pediatric palliative care: describing hospice users and identifying factors that affect hospice expenditures. *J Palliat Med* 2009;12:223-9.
5. Arland LC, Hendricks-Ferguson VL, Pearson J, et al. Development of an in-home standardized end-of-life treatment program for pediatric patients dying of brain tumors. *J Spec Pediatr Nurs* 2013;18:144-57.
6. Postier A, Chrastek J, Nugent S, et al. Exposure to home-based pediatric palliative and hospice care and its impact on hospital and emergency care charges at a single institution. *J Palliat Med* 2014;17:183-8.
7. Gans D, Kominski GF, Roby DH, et al. *Better outcomes, lower costs: palliative care program reduces stress, costs of care for children with life-threatening conditions*. Los Angeles: UCLA Center for Health Policy Research; 2012.
8. Pascuet E, Cowin L, Vaillancourt R, et al. A comparative cost-minimization analysis of providing paediatric palliative respite care before and after the opening of services at a paediatric hospice. *Healthc Manage Forum* 2010;23:63-6.
9. Ward-Smith P, Korphage RM, Hutto C. Where health care dollars are spent when pediatric palliative care is provided. *Nurs Econ* 2008;26:175-8.
10. Belasco JB, Danz P, Drill A, et al. Supportive care: palliative care in children, adolescents, and young adults-model of care, interventions, and cost of care: a retrospective review. *J Palliat Care* 2000;16:39-46.
11. Smith A, Andrews S, Maloney C, et al. Pediatric palliative care in high cost patients. In: Poss WB, editor. *Pediatric critical care medicine. Conference: American Academy of Pediatrics, Section on Critical Care National Conference and Exhibition*. Vol 26. Orlando (FL): Lippincott Williams and Wilkins; 2013. Available: <https://aap.confex.com/aap/2013/webprogram/Paper21649.html> (accessed 2015 Jan. 8).
